# Supplementary material for: Role of Impoundments Created by Low-Head Dams in Affecting Fish Assemblages in Subtropical Headwater Streams in China
Source: Frontiers journal article supplement (doi:10.3389/fevo.2022.916873), 2022-07-04
Supplement: Table_2.XLSX [file Table_2.XLSX]

## Sheet: Sheet1
Basin	Low-head dam	Site type	Zacco platypus	Vanmanenia stenosoma	Acrossocheilus fasciatus	Ctenogobius sp.	Misgurnus anguillicaudatus	Liobagrus styani	Cobitis rarus	Cobitis sinensis	Opasrrichthys bidens	Belligobio nummifer	Monopterus albus	Rhodeus ocellatus	Acheilognathus chankaensis	Odontobutis potamophila	Pseudobagrus truncates	Rhynchocypris oxycephalus	Carassius auratus	Abbottina rivulars	Sinobdella sinensis	Aphyocypris chinensis	Sarcocheilichthys Parvus	Squalidus argentatus	Pseudorasbora parva	Acheilognathus taenianalis	Leptobotia guilinensis	Onychostoma barbatula	Oryzias sinensis	Micropercops swinhonis	Siniperca chuatsi	Parasinilabeo assimilis	Silurus asotus	Pelteobagrus fulvidraco
Qingyi stream	D1	Impoundment	6	0	2	5	1	0	2	0	0	0	0	0	0	0	0	1	0	0	0	0	0	0	0	0	0	0	0	0	0	0	0	0
		below dams	20	3	2	3	0	0	0	0	0	0	0	0	0	0	0	3	0	0	0	0	0	0	0	0	0	1	0	0	0	0	0	0
	D2	Impoundment	4	0	0	3	4	0	0	3	1	1	0	0	0	0	0	0	0	0	0	1	0	0	0	0	0	0	0	0	0	0	0	0
		below dams	9	6	0	45	0	0	0	0	0	0	1	0	0	0	0	0	0	0	0	0	0	0	0	0	0	0	0	0	0	0	0	0
	D3	Impoundment	16	0	3	4	4	0	3	0	0	5	1	0	0	0	0	0	0	0	0	0	0	0	0	0	0	0	0	0	0	0	0	0
		below dams	70	1	1	9	8	0	0	0	0	0	0	0	0	0	0	0	0	0	0	0	0	0	0	0	0	0	0	0	0	0	0	0
	D4	Impoundment	1	0	0	0	0	0	0	0	0	2	0	15	0	0	0	0	0	0	0	0	0	0	7	1	0	0	0	0	0	0	0	0
		below dams	30	0	0	1	2	0	0	0	0	2	0	15	0	0	0	0	0	0	0	0	0	0	0	2	0	0	0	0	0	0	0	0
	D5	Impoundment	20	0	0	0	0	0	0	53	0	0	1	0	0	0	0	0	1	0	0	0	0	0	0	0	0	0	0	0	0	0	0	0
		below dams	35	2	0	23	1	0	1	0	0	0	0	4	0	2	0	0	0	0	0	0	0	0	0	0	0	0	0	0	0	0	0	0
	D6	Impoundment	5	0	0	0	0	0	0	1	0	0	1	1	0	2	0	0	9	1	0	0	0	0	0	0	0	0	0	0	0	0	0	0
		below dams	26	8	0	6	0	0	0	0	1	0	0	1	0	0	0	0	2	0	0	0	0	0	0	0	0	0	0	0	0	0	0	0
	D7	Impoundment	1	0	1	0	3	0	0	50	0	0	0	0	0	7	0	0	5	4	0	1	0	0	2	0	0	0	0	0	0	0	0	0
		below dams	8	0	0	1	1	0	0	1	0	0	0	0	8	1	0	0	0	0	0	0	0	5	0	0	0	0	0	0	0	0	0	0
	D8	Impoundment	1	0	0	2	2	0	0	0	0	0	0	20	14	2	0	0	10	30	0	2	0	0	8	0	0	0	8	1	0	0	0	0
		below dams	18	8	1	24	3	0	0	0	0	0	0	54	24	1	0	0	3	2	0	2	0	0	8	0	0	0	0	0	0	0	0	0
	D9	Impoundment	80	1	0	3	1	0	0	0	0	0	1	0	0	6	0	0	0	0	0	0	0	0	1	0	0	0	0	0	0	0	0	0
		below dams	120	1	0	8	0	0	0	0	0	0	0	0	0	9	0	0	0	0	0	0	0	0	0	0	0	0	0	0	0	0	0	0
	D10	Impoundment	18	0	1	0	0	0	0	0	1	0	0	8	0	8	0	0	1	1	0	0	0	0	7	0	0	0	1	1	0	0	0	0
		below dams	0	0	0	33	4	0	0	0	3	0	0	30	0	13	2	0	4	9	1	0	0	0	13	0	0	0	2	0	0	0	0	0
	D11	Impoundment	56	0	0	0	0	0	0	0	0	0	0	8	0	1	0	0	1	0	0	0	0	0	0	0	0	0	0	0	0	0	0	0
		below dams	145	1	0	0	0	0	0	0	0	0	1	6	0	3	1	0	2	0	0	0	0	0	5	0	0	0	0	0	0	0	0	0
	D12	Impoundment	32	0	0	0	5	0	0	0	0	0	0	28	0	7	0	0	15	0	0	0	0	0	1	0	0	0	0	0	0	0	0	0
		below dams	50	1	0	0	2	0	0	0	0	0	0	24	0	1	0	0	3	0	0	0	0	0	0	0	0	0	0	0	0	0	0	0
	D13	Impoundment	2	0	0	13	0	0	3	0	0	0	0	0	0	0	0	0	0	0	0	0	0	0	0	0	0	0	0	0	0	0	0	0
		below dams	7	23	11	20	0	0	2	0	0	0	0	0	0	0	0	0	0	0	1	0	0	0	0	0	0	0	0	0	0	0	0	0
	D14	Impoundment	17	0	0	0	19	0	0	0	0	0	7	2	0	4	0	0	5	0	0	0	0	0	1	0	0	0	0	0	0	0	0	0
		below dams	70	0	0	10	10	0	0	0	0	0	0	0	0	5	0	0	4	0	0	0	0	0	2	0	0	0	0	0	0	0	0	0
	D15	Impoundment	0	0	1	7	0	0	1	0	0	0	0	0	0	0	0	0	0	0	0	0	0	0	0	0	0	0	0	0	0	0	0	0
		below dams	36	55	2	28	0	1	8	0	0	0	0	0	0	0	0	0	0	0	2	0	0	0	0	0	2	0	0	0	0	0	0	0
	D16	Impoundment	9	4	1	20	2	0	27	0	0	0	0	0	0	0	0	0	0	0	0	0	0	0	0	0	0	0	0	0	0	0	0	0
		below dams	28	4	43	0	0	0	0	0	0	0	0	0	0	0	0	0	0	0	0	0	0	0	0	0	0	0	0	0	0	0	0	0
Qiupu stream	D17	Impoundment	1	0	0	35	0	0	0	0	0	0	0	0	0	0	0	0	0	0	0	0	0	0	0	0	0	0	0	0	1	0	0	0
		below dams	3	1	0	19	2	19	28	0	0	0	0	0	0	0	1	19	0	0	0	0	0	0	0	0	0	0	0	0	1	0	0	0
	D18	Impoundment	0	0	0	3	0	0	10	0	0	0	0	0	0	0	0	0	0	0	0	0	0	0	0	0	0	0	0	0	0	0	0	0
		below dams	0	3	0	17	0	0	0	0	0	0	0	0	0	0	0	1	0	0	1	0	0	0	0	0	0	0	0	0	0	0	1	0
	D19	Impoundment	15	0	0	31	0	0	23	0	0	0	0	0	0	0	0	3	0	0	1	0	0	0	0	0	0	0	0	0	0	0	0	0
		below dams	0	17	0	16	0	0	13	0	0	0	0	0	0	0	4	3	0	0	1	0	0	0	0	0	0	0	0	0	0	1	0	0
	D20	Impoundment	1	0	0	0	0	0	1	0	0	0	0	0	0	0	0	0	0	0	0	0	0	0	0	0	0	0	0	0	0	0	0	0
		below dams	16	0	0	0	0	0	0	0	0	0	0	0	0	0	2	0	0	0	0	0	0	0	0	0	0	0	0	0	3	0	0	0
	D21	Impoundment	20	0	14	30	0	0	0	0	0	0	0	0	0	0	15	0	0	0	0	0	0	0	0	0	0	0	0	0	0	0	0	0
		below dams	0	0	0	1	0	0	16	0	0	0	0	0	0	0	0	1	0	0	0	0	0	0	0	0	0	0	0	0	2	0	0	0
	D22	Impoundment	5	0	0	0	0	0	0	0	0	0	0	0	0	0	0	0	0	0	0	0	0	0	0	0	0	0	0	0	0	0	0	0
		below dams	3	1	0	11	0	0	0	0	0	0	0	0	0	0	0	3	0	0	0	0	0	0	0	0	0	0	0	0	0	0	0	0
	D23	Impoundment	0	0	0	0	8	0	0	0	0	0	0	0	0	0	0	0	0	0	0	0	0	0	0	0	0	0	0	0	0	0	0	0
		below dams	0	0	0	0	0	0	0	0	0	0	0	0	0	0	1	19	0	0	0	0	0	0	0	0	0	0	0	0	0	0	0	0
	D24	Impoundment	0	0	30	15	0	0	0	0	0	0	0	0	0	0	0	110	0	0	0	0	0	0	0	0	0	0	0	0	0	0	0	0
		below dams	0	7	0	15	0	2	0	0	0	0	0	0	0	0	0	110	0	0	0	0	0	0	0	0	0	0	0	0	0	2	0	0
	D25	Impoundment	7	0	0	1	0	0	0	0	0	0	0	0	0	0	0	0	0	0	0	0	0	0	0	0	0	0	0	0	0	0	0	0
		below dams	5	1	0	5	0	0	23	0	0	0	0	0	0	0	0	1	0	0	0	0	0	0	0	0	0	0	0	0	0	0	0	0
Chang stream	D26	Impoundment	45	4	5	2	0	4	18	0	0	0	0	0	0	0	0	0	0	0	0	0	0	0	0	0	0	2	0	0	0	0	0	0
		below dams	22	14	0	10	0	1	9	0	0	0	0	2	0	0	0	0	0	0	0	0	0	0	0	0	0	0	0	0	0	0	0	0
	D27	Impoundment	50	0	2	1	1	0	0	0	0	0	1	26	0	0	0	0	0	1	0	0	0	0	0	0	0	0	0	0	0	0	0	0
		below dams	55	8	0	15	1	0	0	0	0	0	0	62	0	0	0	0	0	3	0	0	0	0	7	0	0	0	0	0	0	0	0	0
	D28	Impoundment	39	1	4	0	0	0	2	0	0	0	0	5	0	0	0	0	0	0	0	0	0	0	0	0	0	0	0	0	0	0	0	0
		below dams	56	0	1	4	0	1	0	0	0	0	0	4	0	0	0	1	0	0	0	0	0	0	0	0	0	0	0	0	0	0	0	0
	D29	Impoundment	10	0	2	3	1	0	0	0	0	1	1	0	0	0	0	0	0	0	0	0	0	0	0	0	0	0	0	0	0	0	0	0
		below dams	18	2	7	0	0	0	0	0	0	2	0	0	0	0	0	0	0	0	0	0	0	0	0	0	0	0	0	0	0	0	0	0
	D30	Impoundment	55	2	3	8	0	0	0	0	0	0	0	0	0	0	1	5	0	0	0	0	0	0	0	0	0	0	0	0	0	0	0	0
		below dams	59	22	5	7	0	2	0	0	0	0	0	0	0	0	0	0	0	0	0	0	0	0	0	0	0	0	0	0	0	0	0	0
	D31	Impoundment	11	2	0	3	1	2	1	0	0	0	0	0	0	1	1	0	0	0	1	0	0	0	0	0	0	0	0	0	0	0	0	0
		below dams	11	26	1	5	0	7	10	0	0	0	0	0	0	0	0	0	0	0	2	0	0	0	0	0	0	0	0	0	0	0	0	0
	D32	Impoundment	8	0	10	10	0	1	10	0	0	2	0	1	0	0	1	0	0	0	1	0	0	0	2	0	0	0	0	0	0	0	0	0
		below dams	7	14	3	18	0	3	6	0	0	0	0	0	0	1	0	0	0	0	0	0	0	0	0	0	0	0	0	0	0	0	0	0
	D33	Impoundment	3	0	0	0	2	0	0	0	0	0	0	3	0	5	0	0	0	0	0	0	0	0	0	0	0	0	0	0	0	0	0	0
		below dams	5	0	0	0	0	1	0	0	0	0	0	2	0	4	1	0	0	0	0	0	0	0	0	0	0	0	0	0	0	0	0	0
	D34	Impoundment	3	1	2	3	0	0	12	0	0	0	0	2	0	0	0	0	0	0	1	0	0	0	0	0	0	0	0	0	0	0	0	0
		below dams	1	3	0	0	1	0	0	0	0	0	0	0	0	1	0	0	0	0	0	0	0	0	0	0	0	0	0	0	0	0	0	0
Xin'an stream	D35	Impoundment	4	4	1	12	0	0	6	0	0	0	0	1	0	0	0	0	0	0	0	0	0	0	0	0	0	0	0	0	0	0	0	0
		below dams	18	13	4	21	2	0	1	0	0	0	0	0	0	0	0	0	0	0	0	0	0	0	0	0	0	0	0	0	0	0	0	0
	D36	Impoundment	10	1	5	15	0	0	2	1	0	0	0	0	0	2	0	0	0	0	0	0	0	0	0	0	0	0	0	0	0	0	0	0
		below dams	3	8	6	3	0	0	1	0	0	0	0	0	0	0	0	0	0	0	0	0	0	0	0	0	0	0	0	0	0	0	0	0
	D37	Impoundment	11	1	14	10	0	0	6	0	0	0	0	0	0	0	0	0	0	0	0	0	0	0	0	0	0	0	0	0	0	0	0	0
		below dams	2	1	9	2	0	0	20	0	0	0	0	0	0	0	0	0	0	0	0	0	0	0	0	0	0	0	0	0	0	0	0	0
	D38	Impoundment	2	4	12	8	0	0	13	0	0	0	0	0	0	0	0	0	0	0	0	0	0	0	0	0	0	0	0	0	0	0	0	0
		below dams	31	5	5	11	0	0	4	0	0	0	0	0	0	0	0	0	0	0	0	0	0	0	0	0	0	0	0	0	0	0	0	0
	D39	Impoundment	5	0	8	0	4	0	0	0	0	0	0	0	0	3	0	0	0	0	0	0	0	0	1	0	0	0	0	0	0	0	0	0
		below dams	25	2	14	8	0	0	0	0	0	0	0	0	0	0	0	0	0	0	0	0	0	0	0	0	0	0	0	0	0	0	0	0
	D40	Impoundment	2	3	5	6	0	0	1	0	0	0	0	0	0	0	0	0	0	0	0	0	0	0	0	0	0	0	0	0	0	0	0	0
		below dams	15	2	2	8	0	0	0	0	0	0	0	0	0	0	0	0	0	0	0	0	0	0	0	0	0	0	0	0	0	0	0	0
	D41	Impoundment	4	5	2	27	0	0	1	0	0	0	0	0	0	0	0	0	0	0	0	0	0	1	0	0	0	0	0	0	0	0	0	0
		below dams	2	0	3	20	0	0	3	0	0	0	0	7	0	0	0	0	0	0	0	0	0	1	0	0	1	1	0	0	0	0	0	0
	D42	Impoundment	0	0	1	0	0	0	0	0	0	0	0	0	0	0	0	0	0	0	0	0	0	0	0	0	0	0	0	0	0	0	0	0
		below dams	1	0	1	1	0	0	0	0	0	0	0	0	0	0	0	0	0	0	0	0	0	0	0	0	0	0	0	0	0	0	0	0
	D43	Impoundment	5	4	8	4	13	0	0	1	5	0	0	1	0	1	0	0	0	0	0	1	1	1	0	0	0	0	0	0	0	0	0	0
		below dams	0	0	8	0	7	0	0	2	0	0	0	3	0	3	1	0	0	0	0	2	0	8	0	0	0	0	0	0	0	0	0	0
	D44	Impoundment	0	0	13	0	1	0	0	0	1	4	0	0	0	3	0	0	0	0	0	5	0	0	0	0	0	0	0	0	0	0	0	0
		below dams	1	1	7	0	7	0	0	0	1	0	1	9	0	0	0	0	0	0	0	24	3	0	0	0	0	0	0	0	0	0	0	0
	D45	Impoundment	30	0	23	0	3	0	0	0	0	0	0	0	0	0	0	0	17	0	0	0	0	0	1	0	0	0	0	0	0	0	0	0
		below dams	15	3	41	2	0	0	0	0	0	0	0	0	0	0	0	0	3	0	0	0	0	0	0	0	0	1	0	0	0	0	0	0
	D46	Impoundment	9	1	10	3	2	0	0	0	0	1	0	1	0	0	0	0	0	0	0	0	0	3	0	0	0	0	0	0	0	0	0	0
		below dams	15	11	30	1	1	0	0	0	1	0	0	15	0	0	0	0	0	0	0	0	0	3	0	0	0	0	0	0	0	0	0	0
	D47	Impoundment	9	0	2	0	0	0	0	0	0	0	0	0	0	2	0	0	0	0	0	0	0	0	1	0	0	0	0	0	0	0	0	0
		below dams	31	4	6	1	1	0	0	0	0	0	0	0	0	0	1	0	0	0	0	0	0	1	0	0	0	0	0	0	0	0	0	0
	D48	Impoundment	1	3	9	46	1	0	3	0	0	0	0	0	0	0	1	0	0	0	0	0	2	0	0	0	0	0	0	0	0	0	0	0
		below dams	0	10	10	54	0	0	1	0	1	0	0	0	0	0	1	0	0	0	0	0	6	0	0	0	0	0	0	0	0	0	0	0
	D49	Impoundment	2	0	7	0	3	0	0	0	1	0	0	0	0	0	2	0	0	0	0	0	10	0	0	0	0	0	0	0	0	0	0	0
		below dams	0	3	13	16	1	0	0	0	3	0	0	0	0	0	3	0	0	0	0	0	11	0	0	0	0	0	0	0	0	0	0	0
	D50	Impoundment	21	0	3	10	0	0	7	0	0	0	0	0	0	0	0	0	0	0	0	0	0	0	0	0	0	0	0	0	0	0	0	0
		below dams	3	0	3	0	0	1	2	0	0	0	0	0	0	0	0	0	0	0	0	0	0	0	0	0	0	0	0	0	0	0	0	0
	D51	Impoundment	0	0	4	7	0	0	0	0	0	0	0	0	0	0	0	0	0	0	0	0	0	0	0	0	0	0	0	0	0	0	0	0
		below dams	2	2	2	6	0	0	0	0	0	0	0	0	0	0	0	1	0	0	0	0	0	0	0	0	0	0	0	0	0	0	0	0
	D52	Impoundment	0	0	0	0	4	0	1	0	0	0	0	0	0	2	0	0	1	0	0	0	0	0	0	0	0	0	0	0	0	0	0	1
		below dams	0	0	0	0	7	0	0	0	0	0	0	0	0	1	0	0	0	0	0	0	0	0	0	0	0	0	0	0	0	0	0	0
	D53	Impoundment	4	1	6	0	0	0	0	0	0	0	0	0	0	0	0	0	0	0	0	0	0	0	0	0	0	0	0	0	0	0	0	0
		below dams	2	1	1	0	0	0	0	0	0	0	0	0	0	0	0	0	0	0	0	0	0	0	0	0	0	0	0	0	0	0	0	0
	D54	Impoundment	1	0	8	0	1	0	0	0	0	0	0	0	0	0	0	0	0	0	0	0	0	0	0	0	0	0	0	0	0	0	0	0
		below dams	4	2	3	0	0	0	0	0	0	0	0	0	0	0	0	0	0	0	0	0	0	0	0	0	0	0	0	0	0	0	0	0
	D55	Impoundment	11	0	17	4	0	0	0	0	0	0	0	0	0	0	0	0	0	0	0	0	0	0	0	0	0	0	0	0	0	0	0	0
		below dams	20	0	7	3	0	0	0	0	0	0	0	0	0	0	0	0	0	0	0	0	0	0	0	0	0	3	0	0	0	0	0	0
	D56	Impoundment	5	0	0	0	3	0	0	0	0	0	0	0	0	27	0	0	0	0	0	0	0	0	0	0	0	0	0	0	0	0	0	0
		below dams	6	0	0	0	0	0	0	0	0	0	0	0	0	0	0	0	0	0	0	0	0	0	0	0	0	0	0	0	0	0	0	0
	D57	Impoundment	4	0	4	0	4	0	0	0	0	0	0	0	0	0	0	0	0	0	0	0	0	0	0	0	0	0	0	0	0	0	0	0
		below dams	9	1	2	1	0	0	0	0	0	0	0	0	0	3	0	0	0	0	0	0	0	0	0	0	0	0	0	0	0	0	0	0
	D58	Impoundment	0	3	0	2	1	0	1	0	0	0	0	0	0	2	0	0	0	0	0	0	0	0	0	0	0	0	0	0	0	0	0	0
		below dams	0	1	0	2	0	0	0	0	0	0	0	0	0	0	0	0	0	0	0	0	0	0	0	0	0	0	0	0	0	0	0	0
	D59	Impoundment	0	0	2	16	0	0	0	0	0	0	0	0	0	0	0	0	0	0	0	0	0	0	0	0	0	0	0	0	0	0	0	0
		below dams	0	5	40	20	0	0	0	0	0	0	0	0	0	0	0	0	0	0	0	0	0	0	0	0	0	0	0	0	0	0	0	0
	D60	Impoundment	51	0	0	3	1	0	0	0	0	0	0	8	0	0	0	0	0	1	0	0	0	0	0	0	0	0	0	0	0	0	0	0
		below dams	32	0	0	10	3	0	0	0	0	0	0	3	0	0	0	0	0	0	0	0	0	0	0	0	0	0	0	0	0	0	0	0
	D61	Impoundment	1	4	13	28	2	0	2	0	1	0	0	0	0	0	0	0	0	0	0	0	0	0	0	0	0	0	0	0	0	0	0	0
		below dams	2	7	5	28	0	0	2	0	0	0	0	0	0	0	0	0	0	0	0	0	0	0	0	0	1	0	0	0	0	0	0	0
